# Supplementary material for: Facile synthesis of single-crystalline NiO nanosheet arrays on Ni foam for high-performance supercapacitors
Source: Royal Society of Chemistry journal article supplement (doi:10.1039/c3ce42335b), 2014-01-01

## Supplementary Information

### Facile synthesis of single-crystalline NiO nanosheet arrays on Ni foam for high-performance supercapacitors

*Ming Huang<sup>a</sup>, Fei Li<sup>a</sup>, Junyi Ji<sup>b,\*</sup>, Yu Xin Zhang<sup>a,c,\*</sup>, Xiao Li Zhao<sup>a</sup>, Xing Gao<sup>a</sup>*

<sup>a</sup> College of Material Science and Engineering, Chongqing University, Chongqing, 400044, P.R. China

<sup>b</sup> College of Chemical Engineering, Sichuan University, Chengdu, Sichuan, 610065, China.

<sup>c</sup> National Key Laboratory of Fundamental Science of Micro/Nano-Devices and System Technology, Chongqing University, Chongqing, 400044, P.R. China

\* Corresponding author. Tel.: +86 23 65104131; Fax: +86 23 65104131

Email: [zhangyuxin@cqu.edu.cn](mailto:zhangyuxin@cqu.edu.cn) (Y.X. Zhang); [junyiji@scu.edu.cn](mailto:junyiji@scu.edu.cn) (J.Y. Ji)

**Fig. S1.** Typical SEM image and corresponding EDS mapping of the Ni foam after annealing in air at 350 °C for 2 h.

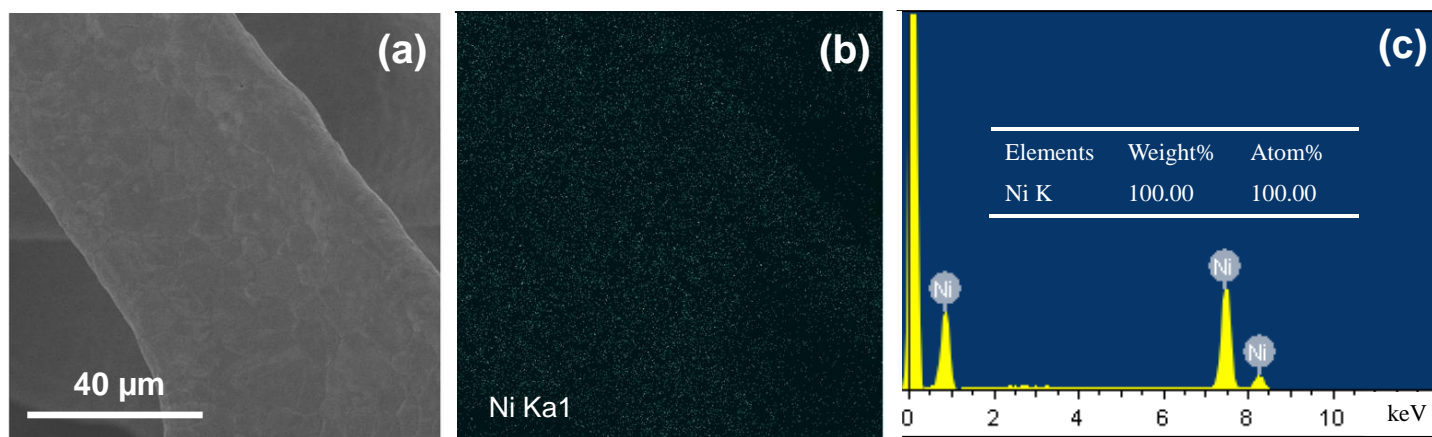

**Fig. S2.** Thermal gravity analysis curve of the bare Ni foam (after acid treatment).

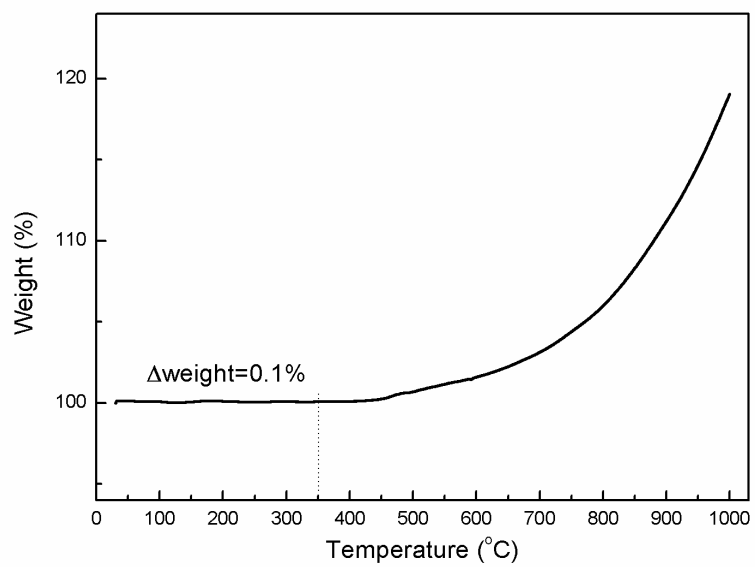

**Fig. S3.** SEM images of NiO nanosheets on Ni foam with different magnifications.

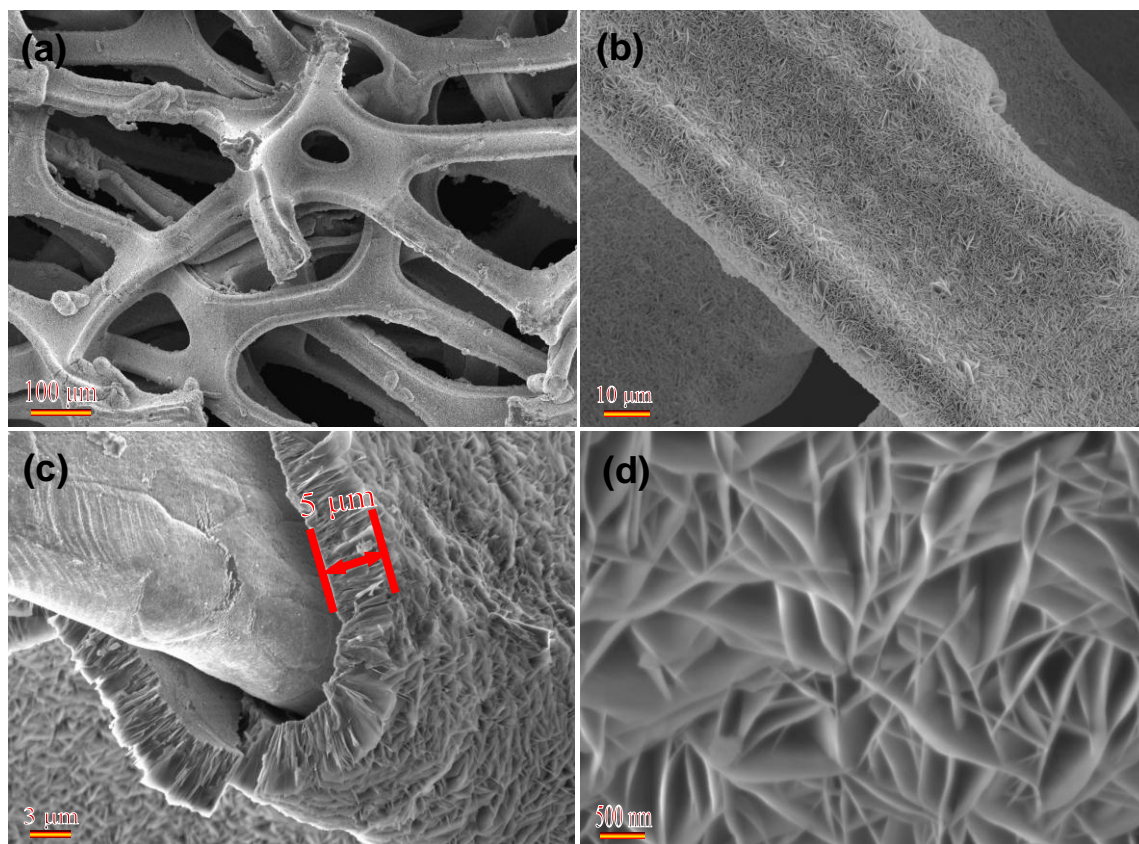

**Fig. S4.** (a) Typical SEM image of NiO nanosheet arrays on Ni foam. Representative EDS data of different regions in (a): (b) region 1 and (c) region 2.

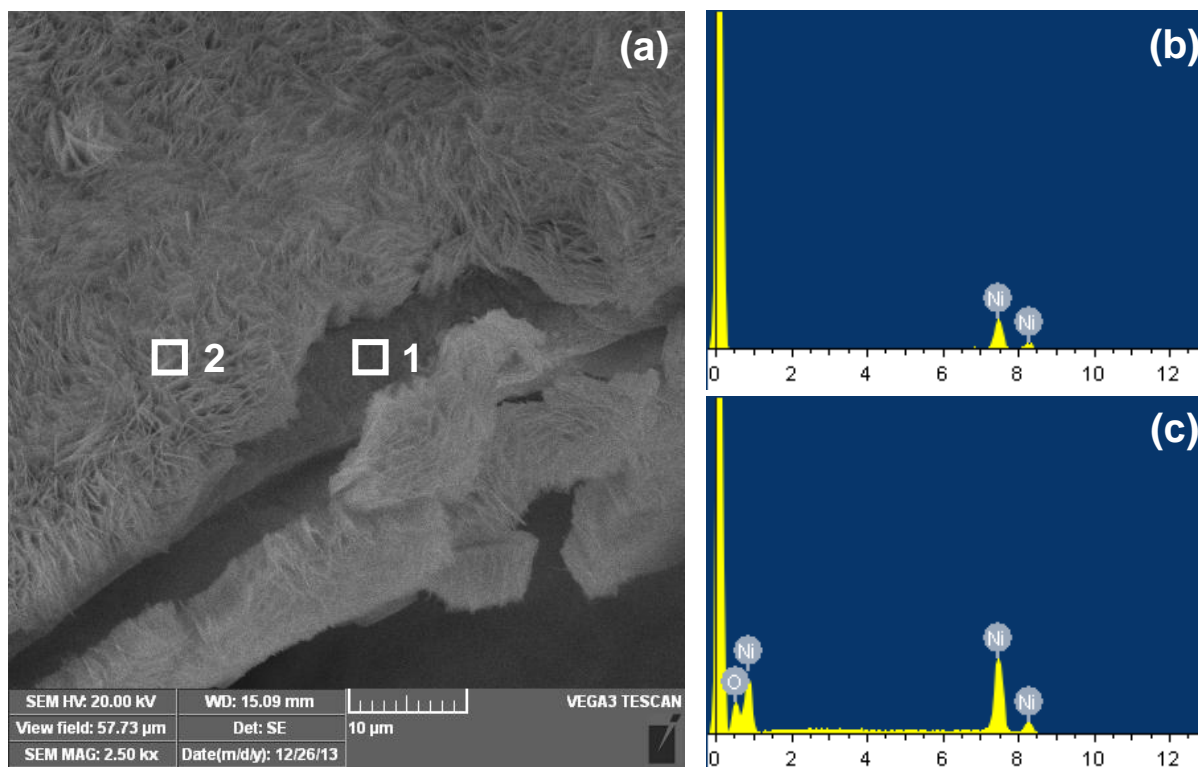

**Fig. S5.** CV curves of NiO nanosheet arrays electrode in 1 M KOH electrolyte measured at various scan rates.

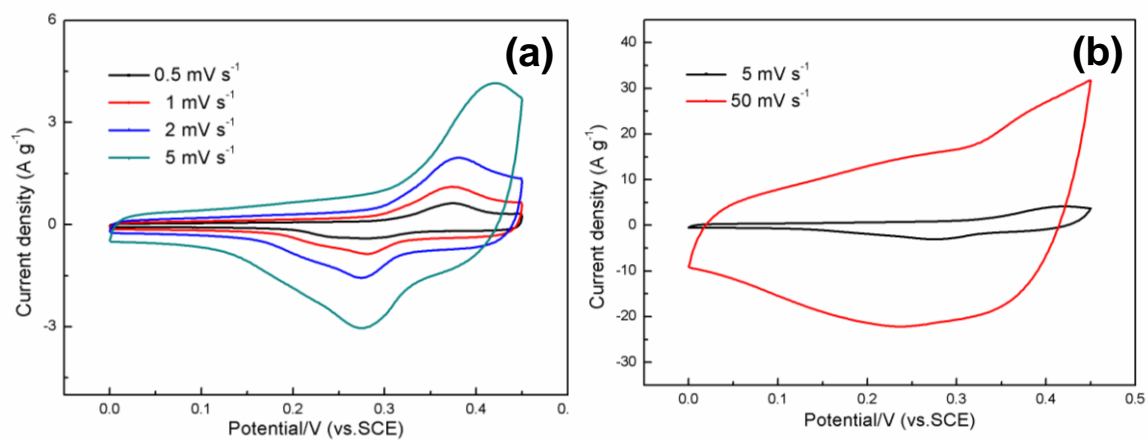

**Fig. S6.** SEM images of the mesoporous NiO nanosheet arrays electrode after 5000 cycles with different magnifications.

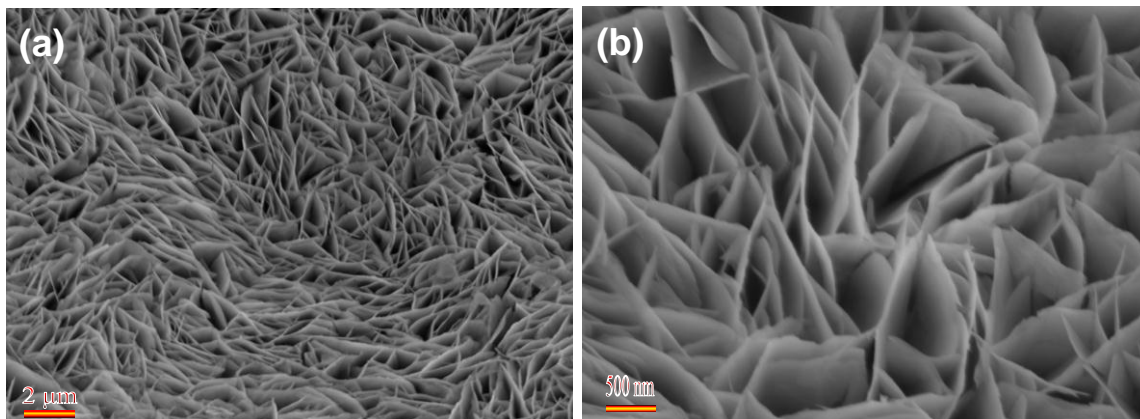

**Fig. S7.** (a) The charging/discharging curves obtained at the current density of  $2 \text{ A g}^{-1}$  after different cycles. (b) CV curves of the NiO electrode after different charging/discharging cycles at a scan rate of  $50 \text{ mV s}^{-1}$ .

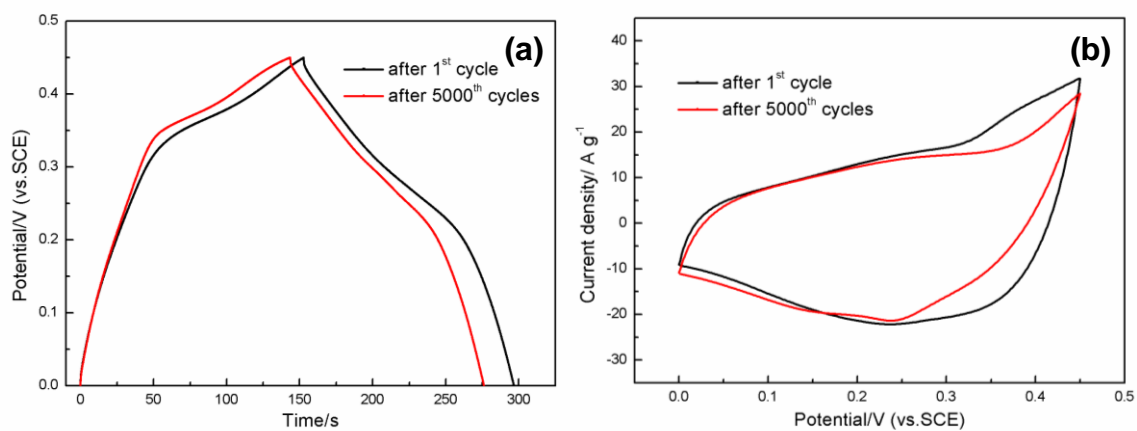



**Fig. S8.** The electrochemical impedance spectra of the NiO electrode during charging/discharging cycles at open circuit potential in the frequency range from 0.01 Hz to 100 kHz.

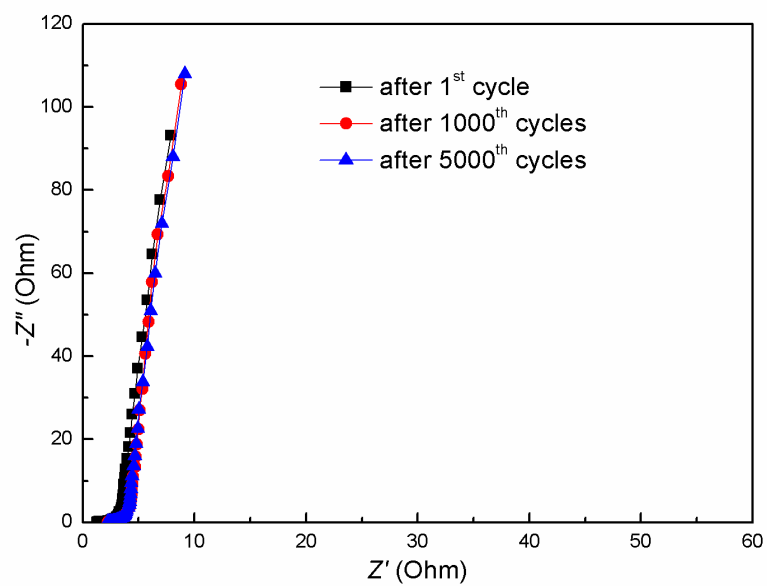

Supplement: c3ce42335b.pdf [file c3ce42335b.pdf]
